# Supplementary material
Source: Springer Nature journal article supplement (https://www.springermedizin.de/resource/supplementary/13102_2013_48_MOESM5_ESM.pdf/9686494)
Supplement: MOESM5 [file 9686494]

# Table 2

Table 2. The training program for elderly participants.

|          | Session 1                           | Session 2                         | Session 3                  |
|----------|-------------------------------------|-----------------------------------|----------------------------|
| Reps.    | 8-10                                | 13-15                             | 3-5                        |
| Rest     | 1 min                               | 45 sec                            | 2 min                      |
|          | <i>Sets</i>                         |                                   |                            |
| Week 1   | 1 ( warm-up ) + 2                   | 1 + 1                             |                            |
| Week 2   | 1 ( warm-up ) + 2                   |                                   | 1 + 1                      |
| Week 3   | 1 ( warm-up ) + 2                   | 1 + 2                             |                            |
| Week 4   | 1 ( warm-up ) + 2                   |                                   | 1 + 2                      |
| Week 5   | 1 ( warm-up ) + 3                   | 1 + 2                             |                            |
| Week 6   | 1 ( warm-up ) + 3                   |                                   | 1 + 3                      |
| Week 7-8 | 1 ( warm-up ) + 3                   | 1 + 3                             | 1 + 3                      |
| Week 9   | 1 ( warm-up ) + 4                   | 1 + 3                             |                            |
| Week 10  | 1 ( warm-up ) + 4                   |                                   | 1 + 4                      |
| Week 11  | 1 ( warm-up ) + 3                   | 1 + 3                             |                            |
| Week 12  | 1 ( warm-up ) + 2(3)                |                                   | 1 + 2(3)                   |
|          | <i>Exercises:</i>                   |                                   |                            |
|          | Bulgarian squat                     | “Sumo” deadlift<br>w/ kettlebells | Leg-extension              |
|          | Squat                               | Lunges                            | Leg press                  |
|          | Bench-press                         | Step up                           | Chest-press                |
|          | Pull-down narrow grip               | Flyes                             | Pull-down wide grip        |
|          | Upright row                         | Seated row machine                | Arnold-press               |
|          | Calf raise                          | Lateral raises                    | Bench-press narrow<br>grip |
|          | French press                        | Triceps pushdown                  | Scott curl                 |
|          | Standing biceps curl<br>w/dumbbells | Scott curl                        | Side-plank<br>(abdominals) |
|          | Quadruped exercise                  | Plank (abdominals)                |                            |
